# Supplementary material for: Social relationships and physician utilization among older adults—A systematic review
Source: PubMed Central journal article supplement (PMC5619811; doi:10.1371/journal.pone.0185672), 2017-09-28
Supplement: pone.0185672.s001.pdf [file pone.0185672.s001.pdf]

## PROSPERO International prospective register of systematic reviews

---

### Social relationships and physician utilization among older adults: a systematic review

*Daniel Bremer, Laura Inhestern, Olaf von dem Knesebeck*

---

#### Citation

Daniel Bremer, Laura Inhestern, Olaf von dem Knesebeck. Social relationships and physician utilization among older adults: a systematic review. PROSPERO 2016:CRD42016036004 Available from [http://www.crd.york.ac.uk/PROSPERO\\_REBRANDING/display\\_record.asp?ID=CRD42016036004](http://www.crd.york.ac.uk/PROSPERO_REBRANDING/display_record.asp?ID=CRD42016036004)

#### Review question(s)

The objective of this review is to assess associations between social relationships and outpatient care utilization among older adults.

The first aim of this systematic review is to provide an overview of studies dealing with outpatient care utilization among older adults associated with various dimensions of social relationships.

The second aim is to evaluate the sufficiency and consistency of associations between social ties and health services use.

#### Searches

The following databases were searched:

- PubMed
- PsycINFO
- CINAHL
- IBSS
- SocINDEX
- Sociological Abstracts
- ASSIA

The search strategies were adjusted to each database without any restrictions to the date of publication. The searches are limited to English and German, journal articles and humans. References of relevant articles will be searched for further studies.

#### Types of study to be included

Observational studies:

- Cross-sectional studies
- Case-control studies
- Cohort studies (retrospective and prospective)

#### Condition or domain being studied

The review focuses on social relationships associated with outpatient health services among older populations (50 years and older).

---

### **Participants/ population**

The review will include observational studies which include a community-dwelling population with the age of fifty and older reporting outpatient visits in a certain period of time while characterizing social relationships of the participants (e.g., quantity and/ or quality of social contacts). The population will not be restricted to specific diseases.

### **Intervention(s), exposure(s)**

Not applicable

### **Comparator(s)/ control**

Not specified

### **Outcome(s)**

#### **Primary outcomes**

outpatient visits (number of visits, visits vs. none)

#### **Secondary outcomes**

none

### **Data extraction, (selection and coding)**

Two researchers extract data independently from included full texts on the basis of a data extraction form.

The extraction form will include the following variables:

author, year, country, research design, study year (follow-up if applicable), sample size, response rate, age, gender, outcome, social relationship variables, and confounders in the fully adjusted model.

### **Risk of bias (quality) assessment**

Two authors will perform independently the assessment of quality of the included studies using a global assessment of the methodological quality.

The quality assessment, including the methodological and reporting quality, is based on a checklist following the Newcastle-Ottawa-Scale and its adaptation of Herzog et al. (2013). The checklist includes the three sections "selection", "comparability and confounders" and "outcome".

We will solve disagreements about the quality by discussion and if necessary with the help of a third researcher.

### **Strategy for data synthesis**

Following Deeks et al. (2009) a narrative synthesis will be conducted by performing vote counting regarding social characteristics (positive, negative and neutral findings). Nevertheless, data will be controlled for performing a meta-analysis. We expect substantial variations in study designs, sampling procedures, data collection methods, outcome variables and social characteristics.

### **Analysis of subgroups or subsets**

If possible, we will determine stratifications on gender, age and chronic disease.

### **Contact details for further information**

Daniel Bremer

Martinistr. 52, 20246 Hamburg

da.bremer@uke.de

### **Organisational affiliation of the review**

Center for Health Care Research, University Medical Center Hamburg-Eppendorf

<http://www.uke.de/english/research/key-research-areas/center-for-health-care-research-chcr/index.html>

**Review team**

Mr Daniel Bremer, Center for Health Care Research & Department of Medical Psychology, University Medical Center Hamburg-Eppendorf  
Miss Laura Inhestern, Department of Medical Psychology, University Medical Center Hamburg-Eppendorf  
Professor Olaf von dem Knesebeck, Department of Medical Sociology, University Medical Center Hamburg-Eppendorf

**Anticipated or actual start date**

27 January 2016

**Anticipated completion date**

27 October 2016

**Funding sources/sponsors**

none

**Conflicts of interest**

None known

**Language**

English

**Country**

Germany

**Subject index terms status**

Subject indexing assigned by CRD

**Subject index terms**

Aged; Drive; Humans; Work

**Stage of review**

Completed but not published

**Date of registration in PROSPERO**

04 March 2016

**Date of publication of this revision**

28 October 2016

**Stage of review at time of this submission**

|                                                                 | <b>Started</b> | <b>Completed</b> |
|-----------------------------------------------------------------|----------------|------------------|
| Preliminary searches                                            | Yes            | Yes              |
| Piloting of the study selection process                         | Yes            | Yes              |
| Formal screening of search results against eligibility criteria | Yes            | Yes              |
| Data extraction                                                 | Yes            | Yes              |
| Risk of bias (quality) assessment                               | Yes            | Yes              |
| Data analysis                                                   | Yes            | Yes              |

---

**PROSPERO**

**International prospective register of systematic reviews**

The information in this record has been provided by the named contact for this review. CRD has accepted this information in good faith and registered the review in PROSPERO. CRD bears no responsibility or liability for the content of this registration record, any associated files or external websites.
